# Supplementary material
Source: MDPI journal article supplement (https://www.mdpi.com/1999-4907/8/8/267)
Supplement: s1 [file s1]

**Table S1.** Summary of previous studies that have investigated nitrogen deposition, drought, and the interactions of ecosystems.

| **Nitrogen Deposition** | | | | | | |
| --- | --- | --- | --- | --- | --- | --- |
| **Ecosystem** | **PFT** | **Region** | **Study Type** | **Nitrogen Treatment** | **Finding** | **Ref.** |
| NA | NA | Global | Overview | NA | N limited ecosystems have stronger growth responses to N deposition, and N mineralization and leaching rates increase. Diversity changes usually result from N deposition. | [17] |
| *Acer saccharum* | BDT | Michigan, USA | N fertilization study | 30 kg NO3- ha-1 yr-1 | Observed increases in photosynthesis, woody carbon, and soil carbon; no change in leaf mass or area was found. | [42] |
| *Acer saccharum*, *Fagus grandifolia*, and *Picea rubens* | BDT | Maine, USA | N fertilization study | 25.2 kg NH4 ha-1 yr-1 | Foliar N increased with increasing N deposition. | [43] |
| *Fagus grandifolia*, *Acer saccharum*, and *Betula alleghaniensis* | BDT | North Carolina and Virginia, USA | N deposition gradient study | 9–15 kg N ha-1 yr-1 | N deposition caused increase in foliar N in all species and an increase in basal area in sugar maple. | [44] |
| *Calluna vulgaris* |  | Europe | N deposition gradient study | 1–15 kg N ha-1 yr-1 | Foliar N increased with increasing N deposition. | [45] |
| 73 forest sites including evergreen needleleaf, evergreen broadleaf, deciduous broadleaf, and mixed forest | NET, BET, BDT | Global (mainly focused on N. America, Europe, and some S. America) | statistical analysis of FLUXNET data paired with estimates of N deposition | 0.5–30 kg N ha-1 yr-1 | In general, the maximum rate of photosynthesis has a positive nonlinear correlation with N deposition for evergreen needleleaf forests, but no relationship in deciduous forests. A positive relationship between N deposition and foliar N exists, but not for all forests. Separating climate effects on carbon cycle is difficult. | [46] |
| *Acer saccharum* | BDT | Michigan, USA | N deposition gradient study | 6.8–11.8 kg N ha-1 yr-1 (mostly NO3-) | N fertilization increased foliar N, but did not stimulate photosynthesis, but nutrient deficiencies may have been present. Nitrogen Use Efficiency (NUE) alsodecreased at treated sites. | [47] |
| Miscanthus | C4 Grass | Illinois | N fertilization study | 0 and 224 kg N ha-1 (form of urea) | Productivity and yield increased as a result of higher canopy leaf area, but no effect on photosynthesis or photosynthetic capacity. | [48] |
| 24 most common species in temperate forests | NET, BET, BDT | North-Central USA | Forest inventory analysis | 3–11 kg N ha-1 yr-1 | Nitrogen deposition caused enhanced growth in most species with mycorrhizal associations. Some had no response and a few had negative growth response. Species with ectomycorrhizal associations showed decreased survivorship. | [49] |
| Needleleaf, deciduous broadleaf, evergreen boradleaf | NET, BET, BDT | Boreal, temperate, and tropical | Statistical analysis | NA | N addition leads to increased carbon uptake in wood. | [50] |
| All | NA | Global | Meta-analysis | low (<100 kg N ha-1) and high (>100 kg N ha-1) | N enrichment resulted in increases in foliar N and biomass, more for herbaceous than woody species. The biomass increase effect decreased with increasing latitude and with decreasing precipitation. | [51] |
| *Acer saccharum* | BDT | Great Lakes region | N fertilization study | 30 kg NO3- ha-1 yr-1 | N deposition resulted in increased biomass in stems, increased maximum tree height, and increased growth rate and mortality of small individuals. | [52] |
| Needleleaf boreal | NET | Northeast China | 3-year N enrichment experiment in an old growth forest | low (20 kg N ha-1 yr-1) medium (50 kg N ha-1 yr‑1) high (100 kg N ha-1 yr-1) | Foliar N increased, woody biomass increased, and NPP increased. | [53] |
| Herbaceous (grasslands) | C3 and C4 grass | India | N fertilization study | 60 kg N ha-1 yr-1 and  120 kg N ha-1 yr-1  (form of urea) | N deposition caused an increase in biomass and trait shifts leading to a reduction in N-fixing species. | [54] |
| Temperate mixed forest | NET, BET, BDT | New York, USA | Survey | 5-10 kg N ha-1 yr-1 | Foliar N increased with increasing N deposition. | [144] |
|  |  |  |  |  |  |  |
| **Drought** | | | | | | |
| **Ecosystem** | **PFT** | **Region** | **Study Type** | **Water Treatment** | **Finding** | **Ref.** |
| Temperate forests | NET, BET, BDT | United States | Review | NA | Forest response to drought will likely include: reduction in NPP and water use, increase in mortality of small plants, and buildup of undecomposed material on forest floor. Deep-rooted plants and those with substantial carbon reserves have higher chance of survival. | [28] |
| Rainforest | NET, BET, BDT | Amazon | Synthesis | NA | Amazon forests are suceptable to water stress through carbon loss. | [39] |
| All | All | Global | Review | NA | Drought reduces productivity and weakens carbon uptake, increases vulnerability to wildfire and mortality from both indirect and direct effects. | [30] |
| Grasslands | C3 and C4 grass | Europe | Greenhouse experiment with 9 species | Watered to field capacity and watered only when leaves withered. | Drought reduced biomass production and alloction to roots. Drought did not impact Specific Leaf Area (SLA). The impacts of droght varied with provenance. | [61] |
| *Pinus halepensis* | NET | NA (seed source Mount Carmel, Isreal) | Greenhouse experiment | 4 water treatments: 100% (350 mL/week/pot) and 75%, 50%, and 25% | Tree growth most sensitive to high drought, with increased biomass to roots and decreased biomass to stems. | [62] |
| *Quercus ilex* | NET | Mediterranean | Precipitation gradient and throughfall exclusion experiment | Along gradient, precipitation increased twofold. Throughfall exclusion experiment experienced ambient and 28% of annual precipitation. | Leaf production and litterfall decreased with decreasing precipitation. Although root production also decreased, the ratio of root to leaf increased with lower water availability. An increasing stem area to leaf area ratio was found with decreasing precipitation, which disapeared after many years and suggests a long-term acclimation process. | [22] |
| Populus | BDT | Belgium | Study over a dry season | Dry spring resulted in 15–25% less precipitation | Dry season resulted in lower GPP and leaf growth. Increased WUE and root allocation during stomatal closure. | [20] |
| C4 grasses Napier grass and Mulato II | C4 Grass | Palmira, Columbia | Greenhouse experiment | Well watered and progressive drying over 21 days | Drought resulted in a 35% reduction in shoot mass for both grasses and a 20–50% reduction in root biomass. Napier grass sustained carbon assimilation longer, while Mulato conserved water with early stomatal closure. | [65] |
| Tropical forest | BET, BDT | Eastern Amazon | Throughfall exclusion experiment | Two treatments: ambient and 50% reduction in precipitation | No eveidnce found to support changes in carbon allocation or growth rate from drought, no depletion in carbon stores occured. Suggest hydraulics are the cause of mortality. | [66] |
| *Fagus sylvatica* forest | BDT | Germany | Precipitation gradient | 540–820 mm/yr | Fine root biomass increases with decreasing precipitation, support optimal partitioning theory. | [21] |
| *Aspalathus linearis* (rooibos) | BDS | South Africa | Greenhouse experiment | Two treatments: weekly watering 100 ml distilled water and no water for 6 weeks. | Decrease in maximum photosynthetic rate and energy storage. Relative growth rate decreased, roots not affected but decline in shoot production. WUE and C/N increased. | [68] |
| *Fagus sylvatica* forest | BDT | Germany | Precipitation gradient and contrasting precipitation years | 520–970 mm/yr; one year had 20% less precipitation and one year had 20% more precipitation than average | Decrease in root biomass with decreasing precipitation. Carbon partitioning between root:leaf increased with increasing moisture. Suggest optimal partitioning is relative and not absolute, root turnover should be considered. | [69] |
| Mediterranean shrubs | BDS, BES | Spain | Greenhouse experiment | Two water amounts: ambient (typical precipitation amounts) and 30% reduction. | More biomass was allocted to roots in water stressed plants. Frequency of water supply did not affect biomass allocation. Biomass was not affected by water supply or frequency. | [23] |
|  |  |  |  |  |  |  |
| **N and Drought** | | | | | | |
| **Ecosystem** | **PFT** | **Region** | **Study Type** | **Water Treatment** | **Finding** | **Ref.** |
| Perennial grass (*Molinia caerulea*) | C3 Grass | Germany | Fertilization/ drought greenhouse study | N: 0 and 48 kg NH4NO3 ha-1 yr-1 W:18% less water treatment | N deposition caused increased evaporative demands and increased drought susceptibility. Grasses were unable to control N allocation during senescence. | [24] |

| Shrub (*Calluna vulgaris*) | BDS | NA | Fertilization/ drought greenhouse study | N: 0 and 48 kg NH4NO3 ha-1 yr-1  W: 12% less water treatment (30% less soil water content) | N and drought treatment resulted in an increased biomass production, increased shoot:root ratios, and N content in biomass. Drought weakened the growth stimulation from the N treatment. | [75] |
| --- | --- | --- | --- | --- | --- | --- |
| Shrub (*Calluna vulgaris*) | BDS | Germany | Fertilization/drought greenhouse and field study | N: 0, 35 kg NH4NO3 ha-1 yr-1  W: 25% reduction in growing season precipitation (35% less soil water content) | Significant nitrogen drought interactions resulted in lower shoot-to-root ratios than expected from individual treatment. Drought susceptibility is dependent on plant age, since investement in above ground biomass is a priority during early development. | [76] |
| Deciduous woody tree (*R. pseudoacacia*) | BDT | NA | Pot manipulation experiment with three water treatments and two N treatments. | N: 0, 154 mg NH4NO3 kg-1 dw soil W: water content of 70-75%, 50-55%, and 30-35% of field capacity | Positive effects (i.e., biomass accumulation leaf WUE) from N fertilization were reduced under severe drought, but did result in reduced transpiration water loss. | [77] |
| Ash (temperate forest) | BDT | Northeast China | Manipulation experiment looking at three water and nitrogen regimes | N: 0, 100 kg NH4NO3 ha-1 yr-1 W: low (33% less), ambient, and high (33% increase) in precipitation | Rubisco increased in leaves under low water and high N treatment, but had no impact on photosynthesis. However, N treatment weakened the reduced growth response caused by low water treatment. | [78] |
| *Picea abies* | NET | Czech Republic | N and drought experiment in two 12-year-old stands | N: 0, 100 kg NH4 ha-1 yr-1 W: 60% precipitation reduction | N and drought resulted in reduced stem biomass, needle length, and fine root biomass. The distribution of roots also occurred with fine roots in deeper soil layers. | [79] |
| Desert plants Brassicaceae and Chenopodiaceae (*Malcolmia africana* and *Brassia hyssopifolia*) | C3 Grass or BDS | China | Nitrogen and drought pot experiment, 3 levels of N treatment and 3 levels of water treatment | N: 0, 94, 370 kg N ha-1 yr-1 W: 60–70%, 30–40%, and 10–20% field capacity | N increased root weight, leaf area, and total biomass, but less so in the drought treatment. Net photosynthetic rate and shoot:root ratio also increased. N deposition in this ecosystem may alleviate some water stress. | [80] |
| *Pinus sylvestris* | NET | Czech Republic | Pot and 12-year-old stand N and drought experiment | N: 0 and 100 kg N ha-1 yr-1 as NH4 W: 60% of precipitation | The combined N and drought effect was a reduced aboveground and root biomass in both the stand and pots. Mycorrhizal infection was also reduced. | [81] |
| Mongolian grassland | C3 and C4 Grass | Mongolia | N fertilization study during drought and non-drought years in grazed and non-grazed plots. | N: 0, 3 kg N ha-1 yr-1, 15 kg N ha-1 yr-1 as NH4NO3 W: about 50% of precipitation during drought years | Drought reduced above ground biomass dispite N addition. During non-drought years, high N addition significantly increased biomass. N addition increased recovery after drought. | [25] |
| *Jatropha curcas* | BES | Brazil | Greenhouse experiment with 4 N treatments and 4 water treatments | N: 0, 0.8, 1.7, and 2.5 g/plant as NH4 W: 40%, 60%, 80%, 100% of plant available water | Drought reduced the effects of N (i.e., increased stem basal area and plant height and leaf area growth). | [82] |
| *Larrea tridentata* | BES | Desert ecosystem | Two treatments of N and soil moisture | N: 0 and 40 kg N ha-1 yr-1  W: 7% (w/w) and 15% (w/w) moisture content | Leaf biomass was lower under water stress, but water content did not affect root-to-shoot ratio. N availability did not seem to have an impact on C uptake. | [83] |
